# Supplementary material for: Effects of Splenectomy Combined with Pericardial Devascularization (SPD) on Adipopenia in Cirrhotic Portal Hypertension Patients
Source: Research Square preprint supplement (doi:10.21203/rs.3.rs-7353059/v1), 2025-08-27
Supplement: Supplementary file 1 [file 0a1e33c28ab272b1a6fb8efa.docx]

|  | Non standardized coefficient | | Standardized coefficient | *t* | *p* | Diagnosis of collinearity | |
| --- | --- | --- | --- | --- | --- | --- | --- |
| *B* | Standard error | *Beta* | VIF | Degree of tolerance |
| Constant | 47.55 | 9.26 | - | 5.14 | 0.00 | - | - |
| BMI | -2.07 | 0.42 | -0.50 | -4.90 | 0.00 | 1.00 | 1.00 |
| *R* 2 | 0.25 | | | | | | |
| *F* | *F* (1,73)=24.01,*p*=0.00 | | | | | | |

**（A）**

|  | Non standardized coefficient | | Standardized coefficient | *t* | *p* | Diagnosis of collinearity | |
| --- | --- | --- | --- | --- | --- | --- | --- |
| *B* | Standard error | *Beta* | VIF | Degree of tolerance |
| Constant | -0.07 | 0.18 | - | -0.39 | 0.70 | - | - |
| Pre-VATI | 0.00 | 0.01 | 0.12 | 0.48 | 0.63 | 3.82 | 0.26 |
| *R* 2 | 0.05 | | | | | | |
| *F* | *F* (2,58)=1.48,*p*=0.24 | | | | | | |

**（B）**

|  | Non standardized coefficient | | Standardized coefficient | t | p | Diagnosis of collinearity | |
| --- | --- | --- | --- | --- | --- | --- | --- |
| B | Standard error | Beta | VIF | Degree of tolerance |
| Constant | 0.57 | 0.29 | - | 1.99 | 0.05 | - | - |
| Pre-VATI | 0.00 | 0.01 | 0.06 | 0.26 | 0.80 | 3.83 | 0.26 |
| R 2 | 0.07 | | | | | | |
| F | F (3,57)=1.45,p=0.24 | | | | | | |

**（C）**

**Table 2** (A) Linear regression analysis of ΔSATI and BMI values; (B) Linear regression analysis of ΔTG with Pre-VATI and Post-VATI; (C) Linear regression analysis of ΔTC and fat index
