# Supplementary material for: Effects of Splenectomy Combined with Pericardial Devascularization (SPD) on Adipopenia in Cirrhotic Portal Hypertension Patients
Source: Research Square preprint supplement (doi:10.21203/rs.3.rs-7353059/v1), 2025-08-27
Supplement: Supplementary file 2 [file b4c401d1b2be216649f9f9f3.docx]

Supplementary Table 1 Comparison of basic data between the cirrhosis group and the control group

| The project | Cirrhosis group（n=75） | Control group（n=33） | *t/X² values* | *p* |
| --- | --- | --- | --- | --- |
| Gender (%) |  |  | 0.001 | 0.98 |
| Male | 32(42.67) | 19(57.58) |  |  |
| Female | 43(57.33) | 14(42.42) |  |  |
| Age (years) | 49.69±12.47 | 52.45±8.31 | -1.353 | 0.17 |
| Height (m) | 1.65±0.08 | 1.63±0.08 | 1.330 | 0.18 |
| Body weight (kg) | 59.45±10.19 | 60.58±11.68 | -0.504 | 0.61 |
| BMI（Kg/m²） | 21.72±2.73 | 22.68±3.12 | -1.606 | 0.11 |

Supplementary Table 2 Comparison of clinical indicators between the cirrhosis group and the control group

| The project | Cirrhosis group（n=75） | Control group（n=33） | *t/X² values* | p | |
| --- | --- | --- | --- | --- | --- |
| RBC（×109/L） | 3.46±0.86 | 4.56±0.44 | -8.776 | 0.00 | |
| WBC（×1012/L） | 2.49(1.8,3.4) | 5.07(4.1,7.1) | -5.846 | 0.01 | |
| PLT（×109/L） | 54.00(37.0,69.0) | 189.00(160.5,229.5) | -7.884 | 0.00 |
| HB（g/L） | 93.71±30.05 | 137.18±15.59 | -9.868 | 0.00 |
| TBIL（μmmol/L） | 21.80(15.2,28.8) | 12.90(9.6,15.9) | -5.543 | 0.00 |
| DBIL（μmmol/L） | 6.50(4.9,10.7) | 3.23(2.3,4.2) | -6.870 | 0.00 |
| ALB（g/L） | 35.20(32.3,39.6) | 42.40(39.8,45.4) | -5.533 | 0.01 |
| ALBI score | -2.13±0.49 | -2.89±0.33 | 9.34 | 0.00 |
| PT（s） | 13.40(12.5,14.8) | 10.40(9.8,10.9) | -7.302 | 0.00 |
| TG（mmol/L） | 0.76(0.6,1.0) | 1.03(0.8,1.4) | -3.189 | 0.01 |
| TC（mmol/L） | 2.76±0.74 | 4.33±1.01 | -8.485 | 0.00 |
| HDL（mmol/L） | 0.95(0.7,1.2) | 1.14(1.0,1.3) | -2.944 | 0.01 |
| LDL（mmol/L） | 1.53(1.2,1.8) | 2.80(2.2,3.4) | -6.141 | 0.01 |
| VATI（cm²/m²） | 29.62(19.4,43.7) | 52.16(34.5,67.3) | -3.578 | 0.01 |
| SATI（cm²/m²） | 31.37(14.9,48.0) | 54.00(43.7,68.1) | -4.665 | 0.00 |

Supplementary Table 3 Comparison of clinical indicators before and after surgery in the cirrhosis group

| The project | Before surgery | After surgery | t/z value | p |
| --- | --- | --- | --- | --- |
| RBC（×109/L） | 3.46±0.86 | 3.85±0.87 | -3.402 | 0.00 |
| WBC（×1012/L） | 2.49(1.8,3.4) | 5.78(4.7,6.9) | 6.405 | 0.00 |
| PLT（×109/L） | 54.00(37.5,69.0) | 227.00(179.5,316.0) | 7.509 | 0.00 |
| HB（g/L） | 93.71±30.05 | 113.72±30.91 | -4.670 | 0.00 |
| TBIL（μmmol/L） | 21.80(15.4,28.8) | 16.10(12.6,24.1) | 3.493 | 0.00 |
| DBIL（μmmol/L） | 6.50(4.9,10.6) | 4.39(3.5,7.3) | 5.043 | 0.00 |
| TP（g/L） | 63.70(59.0,68.3) | 69.00(63.0,75.6) | 3.493 | 0.00 |
| ALB（g/L） | 35.20(32.4,39.5) | 37.30(33.6,41.6) | 1.484 | 0.13 |
| ALBI score | -2.13±0.49 | -2.37±0.69 | 2.50 | 0.01 |
| TC（mmol/L） | 2.76±0.74 | 3.85±1.10 | -8.834 | 0.00 |
| TG（mmol/L） | 0.76(0.6,1.0) | 0.89(0.6,1.2) | 1.422 | 0.15 |
| HDL（mmol/L） | 0.96±0.33 | 1.30±0.48 | -5.144 | 0.00 |
| LDL（mmol/L） | 1.53(1.2,1.8) | 2.10(1.7,2.6) | 4.972 | 0.00 |
| PT（s） | 13.45(12.6,14.8) | 11.95(11.2,12.7) | 5.269 | 0.00 |
| VATI（cm²/m²） | 29.62(19.8,43.4) | 28.37(19.5,43.6) | 1.035 | 0.30 |
| SATI（cm²/m²） | 31.37(16.4,47.8) | 34.19(20.0,47.0) | 3.020 | 0.00 |

Supplementary Table 4 Comparison of basic data between the non-elderly group and the elderly group subgroups

| The project | Non-elderly group（n=55） | Elderly group（n=20） | t/X2 value | p |
| --- | --- | --- | --- | --- |
| Gender |  |  | 0.001 | 0.98 |
| Male | 37(67.27) | 14(70.00) |  |  |
| Female | 18(32.73) | 6(30.00) |  |  |
| Age (years) | 44.73±10.33 | 63.35±5.86 | -9.74 | 0.00 |
| Height (m) | 1.66±0.09 | 1.63±0.07 | 1.90 | 0.06 |
| Body weight (kg) | 60.27±10.83 | 57.20±8.00 | 1.16 | 0.25 |
| BMI (Kg/m²) | 21.76±2.95 | 21.60±2.06 | 0.27 | 0.79 |
| Time (months) | 15.56±10.93 | 14.70±9.23 | 0.31 | 0.75 |

Supplementary Table 5 Comparison of clinical indicators between the non-elderly group and the elderly group subgroups

| The project | Non-elderly group（n=55） | Elderly group（n=20） | t/z value | p |
| --- | --- | --- | --- | --- |
| RBC（×109/L） | 3.58±0.88 | 3.12±0.71 | 2.11 | 0.04 |
| WBC（×1012/L） | 2.43(1.77,3.40) | 2.61(1.92,3.93) | -0.83 | 0.41 |
| PLT（×109/L） | 54.00(36.00,67.00) | 53.50(45.25,77.00) | -0.93 | 0.35 |
| HB（g/L） | 95.35±33.60 | 89.20±16.74 | 1.05 | 0.30 |
| TBIL（μmmol/L） | 22.30(15.20,28.80) | 21.30(14.46,29.45) | -0.62 | 0.53 |
| DBIL（μmmol/L） | 6.15(4.70,9.67) | 8.47(5.91,11.18) | -1.32 | 0.19 |
| TP（g/L） | 64.30(59.70,68.70) | 63.35(56.25,66.78) | -1.07 | 0.29 |
| ALB（g/L） | 35.60(33.00,39.90) | 32.85(26.85,37.98) | -2.05 | 0.04 |
| TC（mmol/L） | 2.78±0.70 | 2.71±0.84 | 0.30 | 0.77 |
| TG（mmol/L） | 0.77±0.24 | 1.06±0.38 | -2.88 | 0.01 |
| HDL（mmol/L） | 1.00±0.33 | 0.84±0.29 | 1.66 | 0.10 |
| LDL（mmol/L） | 1.52(1.22,1.78) | 1.56(1.26,2.27) | -0.36 | 0.72 |
| PT（s） | 13.40(12.50,14.60) | 13.80(12.43,15.50) | -0.59 | 0.56 |
| VATI（cm²/m²） | 27.78(19.05,40.75) | 40.07(22.51,53.73) | -1.81 | 0.07 |
| SATI（cm²/m²） | 31.00(14.49,47.69) | 34.49(21.26,48.45) | -0.80 | 0.42 |
| ΔTC（mmol/L） | 1.03±1.02 | 1.26±0.80 | -0.82 | 0.41 |
| ΔTG（mmol/L） | 0.20±0.70 | 0.18±0.59 | 0.10 | 0.92 |
| ΔVATI（cm²/m²） | -0.81±9.76 | 1.21±12.46 | -0.73 | 0.47 |
| ΔSATI（cm²/m²） | 1.94±11.58 | 4.24±10.81 | -0.77 | 0.44 |

Supplementary Table 6 Comparison of main clinical indicators before and after surgery between the non-elderly group and the elderly group

| The project | Before surgery | After surgery | t/z value | p |
| --- | --- | --- | --- | --- |
| Non-elderly group |  |  |  |  |
| TC（mmol/L） | 2.78±0.70 | 3.81±1.10 | -6.78 | 0.00 |
| TG（mmol/L） | 0.72(0.61,0.93) | 0.80(0.58,1.04) | 1.29 | 0.20 |
| HDL（mmol/L） | 1.01±0.34 | 1.31±0.46 | -3.83 | 0.00 |
| LDL（mmol/L） | 1.52(1.22,1.78) | 2.03(1.77,2.64) | 4.09 | 0.00 |
| VATI（cm²/m²） | 27.78(19.21,40.64) | 27.16(19.04,38.70) | 1.24 | 0.21 |
| SATI（cm²/m²） | 31.00(14.68,47.54) | 34.19(18.35,43.41) | 2.35 | 0.02 |
| Elderly group |  |  |  |  |
| TC（mmol/L） | 2.69(2.26,3.01) | 3.91(3.33,4.26) | 3.46 | 0.00 |
| TG（mmol/L） | 0.94(0.76,1.32) | 1.15(0.83,1.42) | 0.44 | 0.66 |
| HDL（mmol/L） | 0.84±0.29 | 1.30±0.55 | -3.50 | 0.00 |
| LDL（mmol/L） | 1.66±0.76 | 2.33±0.84 | -3.53 | 0.00 |
| VATI（cm²/m²） | 39.61±18.73 | 40.82±24.34 | -0.43 | 0.67 |
| SATI（cm²/m²） | 37.09±20.12 | 41.33±22.26 | -1.75 | 0.10 |

Supplementary Table 7 Comparison of preoperative clinical indicators between female group and male group subgroups

| The project | Female（n=32） | Male（n=43） | t/z value | p |
| --- | --- | --- | --- | --- |
| RBC（×109/L） | 3.18±0.60 | 3.67±0.96 | -2.69 | 0.01 |
| WBC（×1012/L） | 2.21(1.75,3.19) | 2.53(1.93,3.69) | -1.48 | 0.14 |
| PLT（×109/L） | 51.50(37.00,75.00) | 55.00(38.00,69.00) | -0.12 | 0.90 |
| HB（g/L） | 90.50(75.75,98.75) | 101.00(72.00,127.00) | -1.68 | 0.09 |
| TBIL（μmmol/L） | 21.90(14.61,26.95) | 21.80(15.20,36.60) | -0.62 | 0.53 |
| DBIL（μmmol/L） | 6.38(4.82,9.48) | 7.00(4.87,12.65) | -0.90 | 0.37 |
| TP（g/L） | 61.90(57.30,67.77) | 65.00(60.70,68.70) | -1.58 | 0.11 |
| ALB（g/L） | 34.52±5.57 | 36.30±5.40 | -1.39 | 0.17 |
| TC（mmol/L） | 2.82±0.60 | 2.72±0.81 | 0.51 | 0.61 |
| TG（mmol/L） | 0.95±0.33 | 0.78±0.28 | 2.10 | 0.04 |
| HDL（mmol/L） | 0.94±0.26 | 0.97±0.36 | -0.42 | 0.68 |
| LDL（mmol/L） | 1.69(1.48,2.03) | 1.41(1.12,1.65) | -2.33 | 0.02 |
| PT（s） | 13.40(12.83,14.67) | 13.70(12.30,15.20) | -0.53 | 0.60 |
| VATI（cm²/m²） | 39.33(25.20,44.48) | 24.28(19.00,41.68) | -1.68 | 0.09 |
| SATI（cm²/m²） | 45.30(34.24,55.05) | 20.05(11.52,34.10) | -4.71 | 0.00 |
| ΔTC（mmol/L） | 1.67(0.70,2.11) | 0.88(0.54,1.29) | -2.88 | 0.00 |
| ΔTG（mmol/L） | 0.07(-0.15,0.44) | -0.07(-0.18,0.28) | -0.88 | 0.38 |
| ΔVATI（cm²/m²） | -0.56(-8.27,6.58) | -1.47(-5.97,4.67) | -0.05 | 0.96 |
| ΔSATI（cm²/m²） | 3.92(-1.01,11.33) | 2.50(-0.92,5.80) | -1.23 | 0.22 |

Supplementary Table 8 Comparison of main clinical indicators between males and females before and after surgery

| The project | Before surgery | After surgery | t/z value | p |
| --- | --- | --- | --- | --- |
| Male |  |  |  |  |
| TC（mmol/L） | 2.72±0.81 | 3.54±0.94 | -6.40 | 0.00 |
| TG（mmol/L） | 0.72(0.60,0.93) | 0.77(0.58,1.03) | 0.54 | 0.59 |
| HDL（mmol/L） | 0.97±0.36 | 1.18±0.39 | -2.82 | 0.01 |
| LDL（mmol/L） | 1.41(1.13,1.65) | 1.96(1.52,2.46) | 3.45 | 0.00 |
| VATI（cm²/m²） | 24.28(19.01,41.33) | 25.73(18.11,39.56) | 0.99 | 0.32 |
| SATI（cm²/m²） | 24.48±15.66 | 26.31±15.19 | -1.52 | 0.14 |
| Female |  |  |  |  |
| TC（mmol/L） | 2.82±0.60 | 4.36±1.17 | -6.88 | 0.00 |
| TG（mmol/L） | 0.94(0.71,1.17) | 1.05(0.81,1.44) | 1.61 | 0.11 |
| HDL（mmol/L） | 0.95±0.27 | 1.51±0.56 | -5.05 | 0.00 |
| LDL（mmol/L） | 1.78±0.60 | 2.65±0.74 | -5.21 | 0.00 |
| VATI（cm²/m²） | 39.33(26.92,43.96) | 31.51(20.26,44.69) | 0.47 | 0.64 |
| SATI（cm²/m²） | 45.30(34.47,54.92) | 50.34(35.96,60.28) | 2.19 | 0.03 |

Supplementary Table 9 Comparison of basic data between the low BMI group and the high BMI group

| The project | Low BMI Group（n=37） | High BMI Group（n=38） | t/χ2 value | p |
| --- | --- | --- | --- | --- |
| Gender |  |  | 0.32 | 0.57 |
| male | 20(54.05) | 23(60.53) |  |  |
| female | 17(45.95) | 15(39.47) |  |  |
| Age (years) | 48.46±12.12 | 50.89±12.84 | -0.84 | 0.40 |
| Height (m) | 1.64±0.08 | 1.66±0.08 | -0.84 | 0.40 |
| Body weight (kg) | 52.88±6.87 | 65.86±8.75 | -7.13 | 0.00 |
| BMI (Kg/m²) | 19.52±1.28 | 23.86±1.93 | -11.52 | 0.00 |
| Time (months) | 15.76±9.95 | 14.92±11.03 | 0.34 | 0.73 |

Supplementary Table 10 Comparison of clinical indicators between the low BMI group and the high BMI group

| The project | Low BMI Group（n=37） | High BMI Group（n=38） | t/z value | p |
| --- | --- | --- | --- | --- |
| RBC（×109/L） | 3.54±0.90 | 3.38±0.82 | 0.83 | 0.41 |
| WBC（×1012/L） | 2.40(1.83,3.15) | 2.63(1.78,4.24) | -0.98 | 0.33 |
| PLT（×109/L） | 50.00(35.50,66.00) | 56.50(42.00,75.00) | -1.42 | 0.16 |
| HB（g/L） | 93.81±30.40 | 93.61±30.13 | 0.03 | 0.98 |
| TBIL（μmmol/L） | 22.10(16.05,29.15) | 21.75(14.45,28.80) | -0.55 | 0.58 |
| DBIL（μmmol/L） | 6.12(4.63,11.09) | 6.54(5.20,9.98) | -0.63 | 0.53 |
| TP（g/L） | 63.50(59.65,70.35) | 64.00(56.95,66.85) | -1.25 | 0.21 |
| ALB（g/L） | 35.90±5.29 | 35.19±5.76 | 0.56 | 0.58 |
| TC（mmol/L） | 2.84±0.67 | 2.69±0.80 | 0.81 | 0.42 |
| TG（mmol/L） | 0.76(0.61,0.95) | 0.81(0.64,1.05) | -0.24 | 0.81 |
| HDL（mmol/L） | 1.00±0.33 | 0.92±0.32 | 0.87 | 0.39 |
| LDL（mmol/L） | 1.56(1.20,1.92) | 1.52(1.23,1.82) | -0.52 | 0.61 |
| PT（s） | 13.40(12.25,14.80) | 13.55(12.57,14.80) | -0.02 | 0.98 |
| VATI（cm²/m²） | 29.84±13.76 | 36.51±18.52 | -1.77 | 0.08 |
| SATI（cm²/m²） | 23.47(12.70,45.59) | 36.68(26.80,50.71) | -2.15 | 0.03 |
| ΔTC（mmol/L） | 0.96±0.90 | 1.21±1.02 | -1.02 | 0.31 |
| ΔTG（mmol/L） | -0.02(-0.18,0.15) | 0.12(-0.15,0.53) | -1.36 | 0.17 |
| ΔVATI（cm²/m²） | -1.33(-5.30,3.60) | -1.21(-7.72,6.45) | -0.22 | 0.82 |
| ΔSATI（cm²/m²） | 4.56(1.14,10.90) | 0.93(-8.52,6.12) | -2.85 | 0.00 |

Supplementary Table 11 Comparison of main indicators before and after surgery between BMI group and high BMI group

| The project | Female（n=32） | Male（n=43） | t/z value | p |
| --- | --- | --- | --- | --- |
| Low BMI Group |  |  |  |  |
| TC（mmol/L） | 2.84±0.67 | 3.80±1.05 | -5.73 | 0.00 |
| TG（mmol/L） | 0.76(0.62,0.94) | 0.75(0.58,0.93) | 0.25 | 0.80 |
| HDL（mmol/L） | 1.01±0.34 | 1.30±0.51 | -2.84 | 0.01 |
| LDL（mmol/L） | 1.56(1.20,1.92) | 2.20(1.71,2.54) | 3.32 | 0.00 |
| VATI（cm²/m²） | 27.09(20.23,40.75) | 25.73(18.63,38.39) | 0.82 | 0.41 |
| SATI（cm²/m²） | 23.47(12.71,43.21) | 32.09(13.73,50.53) | 4.37 | 0.00 |
| High BMI Group |  |  |  |  |
| TC（mmol/L） | 2.69±0.80 | 3.90±1.15 | -6.72 | 0.00 |
| TG（mmol/L） | 0.81(0.65,1.04) | 1.02(0.73,1.34) | 2.04 | 0.04 |
| HDL（mmol/L） | 0.92±0.32 | 1.31±0.47 | -4.43 | 0.00 |
| LDL（mmol/L） | 1.52(1.24,1.79) | 2.03(1.84,2.75) | 3.68 | 0.00 |
| VATI（cm²/m²） | 38.00(19.58,45.66) | 32.16(20.13,47.69) | 0.73 | 0.46 |
| SATI（cm²/m²） | 36.68(28.16,49.13) | 36.31(23.31,43.64) | 0.02 | 0.98 |

Supplementary Table 12 Comparison of basic data between the subgroups of the lipomatosis group and the non-lipomatosis group

| The project | Lipopenia group（n=37） | Non-lipopenia group（n=38） | t/X2 value | p |
| --- | --- | --- | --- | --- |
| Gender |  |  | 20.89 | 0.00 |
| male | 31(83.78) | 12(31.58) |  |  |
| female | 6(16.22) | 26(68.42) |  |  |
| Age (years) | 47.86±12.86 | 51.47±11.97 | -1.26 | 0.21 |
| Height (m) | 1.69±0.07 | 1.62±0.07 | 4.13 | 0.00 |
| Body weight (kg) | 60.59±9.06 | 58.34±11.20 | 0.96 | 0.34 |
| BMI (Kg/m²) | 21.26±2.63 | 22.16±2.77 | -1.44 | 0.15 |
| Time (months) | 15.70±11.13 | 14.97±9.88 | 0.30 | 0.76 |

Supplementary Table 13 Comparison of clinical indicators between the subgroups of the lipidosis group and the non-lipidosis group

| The project | Lipopenia group（n=37） | Non-lipopenia group（n=38） | t/z value | p |
| --- | --- | --- | --- | --- |
| RBC（×109/L） | 3.57±0.96 | 3.35±0.74 | 1.09 | 0.28 |
| WBC（×1012/L） | 2.82(1.90,3.75) | 2.34(1.76,3.31) | -1.21 | 0.22 |
| PLT（×109/L） | 56.00(39.50,76.00) | 47.50(36.75,67.00) | -1.03 | 0.30 |
| HB（g/L） | 94.73±33.40 | 92.71±26.82 | 0.29 | 0.77 |
| TBIL（μmmol/L） | 21.80(15.10,35.35) | 21.90(15.30,27.95) | -0.36 | 0.72 |
| DBIL（μmmol/L） | 6.54(4.70,10.86) | 6.38(5.15,10.77) | -0.06 | 0.95 |
| TP（g/L） | 65.10(59.40,70.35) | 62.75(57.60,66.72) | -1.52 | 0.13 |
| ALB（g/L） | 36.48±5.96 | 34.63±4.94 | 1.46 | 0.15 |
| TC（mmol/L） | 2.74±0.82 | 2.79±0.65 | -0.26 | 0.79 |
| TG（mmol/L） | 0.71(0.59,0.90) | 0.94(0.70,1.09) | -2.06 | 0.04 |
| HDL（mmol/L） | 0.98±0.33 | 0.94±0.32 | 0.46 | 0.65 |
| LDL（mmol/L） | 1.44(1.11,1.65) | 1.64(1.34,1.89) | -1.74 | 0.08 |
| PT（s） | 13.40(12.60,15.40) | 13.50(12.50,14.72) | -0.41 | 0.68 |
| VATI（cm²/m²） | 21.96(15.71,30.16) | 40.64(29.32,47.40) | -4.19 | 0.00 |
| ΔTC（mmol/L） | 0.94±0.80 | 1.25±1.11 | -1.27 | 0.21 |
| ΔTG（mmol/L） | -0.09(-0.21,0.21) | 0.15(-0.13,0.45) | -1.65 | 0.10 |
| ΔVATI（cm²/m²） | -0.71(-4.32,4.76) | -2.00(-8.52,5.50) | -1.24 | 0.22 |
| ΔSATI（cm²/m²） | 3.12(0.15,6.84) | 3.78(-5.93,8.38) | -0.34 | 0.73 |

Supplementary Table 14 Comparison of main clinical indicators before and after surgery between the lipidosis group and the non-lipidosis group

| The project | Before surgery | After surgery | t/z value | p |
| --- | --- | --- | --- | --- |
| Lipopenia group |  |  |  |  |
| TC（mmol/L） | 2.74±0.82 | 3.68±0.99 | -6.64 | 0.00 |
| TG（mmol/L） | 0.71(0.60,0.87) | 0.72(0.57,0.98) | 0.36 | 0.72 |
| HDL（mmol/L） | 0.98(0.67,1.24) | 1.05(0.87,1.43) | 2.37 | 0.02 |
| LDL（mmol/L） | 1.44(1.13,1.65) | 1.99(1.63,2.56) | 3.59 | 0.00 |
| VATI（cm²/m²） | 21.96(16.09,28.64) | 23.00(17.05,32.28) | 0.10 | 0.92 |
| SATI（cm²/m²） | 14.88(11.36,23.64) | 19.85(11.52,30.79) | 3.67 | 0.00 |
| Non-lipopenia group |  |  |  |  |
| TC（mmol/L） | 2.79±0.65 | 4.04±1.20 | -6.10 | 0.00 |
| TG（mmol/L） | 0.94(0.71,1.06) | 1.01(0.82,1.33) | 2.27 | 0.02 |
| HDL（mmol/L） | 0.95±0.33 | 1.42±0.53 | -4.56 | 0.00 |
| LDL（mmol/L） | 1.64(1.34,1.89) | 2.44(1.94,3.20) | 3.46 | 0.00 |
| VATI（cm²/m²） | 40.64(29.81,46.69) | 36.93(23.39,51.84) | 1.30 | 0.19 |
| SATI（cm²/m²） | 47.83(39.90,55.22) | 47.03(39.99,59.80) | 1.07 | 0.29 |
